# Supplementary material for: Resilience and Self-Esteem Mediated Associations between Childhood Emotional Maltreatment and Aggression in Chinese College Students
Source: MDPI journal article supplement (doi:10.3390/bs12100383), 2022-10-07
Supplement: s1 [file s1]

**Supplementary file S1: Emotional Maltreatment in Childhood Trauma Questionnaire-short form**

|                                                                                                             |   |   |   |   |   |
|-------------------------------------------------------------------------------------------------------------|---|---|---|---|---|
| 1、When I was growing up, someone in my family called me things like “stupid” or “lazy” or “ugly.”           | 1 | 2 | 3 | 4 | 5 |
| 2、When I was growing up, there was someone in my family who helped me feel that I was important or special. | 1 | 2 | 3 | 4 | 5 |
| 3、When I was growing up, people in my family looked out for each other.                                     | 1 | 2 | 3 | 4 | 5 |
| 4、When I was growing up, I thought that my parents wished I had never been born.                            | 1 | 2 | 3 | 4 | 5 |
| 5、When I was growing up, someone in my family loved me.                                                     | 1 | 2 | 3 | 4 | 5 |
| 6、When I was growing up, people in my family said hurtful or insulting things to me.                        | 1 | 2 | 3 | 4 | 5 |
| 7、When I was growing up, I felt that someone in my family hated me.                                         | 1 | 2 | 3 | 4 | 5 |
| 8、When I was growing up, people in my family felt close to each other.                                      | 1 | 2 | 3 | 4 | 5 |
| 9、When I was growing up, I believe that I was emotionally abused                                            | 1 | 2 | 3 | 4 | 5 |
| 10、When I was growing up, my family was a source of strength and support.                                   | 1 | 2 | 3 | 4 | 5 |
| <b>Supplementary file S2: The Aggression Questionnaire</b>                                                  |   |   |   |   |   |
| 1、I will not tell to others when I feel blue                                                                | 1 | 2 | 3 | 4 | 5 |
| 2、I have a lot of mood swings and ups and downs                                                             | 1 | 2 | 3 | 4 | 5 |
| 3、Sometimes I will lose control to beat others                                                              | 1 | 2 | 3 | 4 | 5 |
| 4、If I disagree with my friends’ opinion, I will give feedback immediately                                  | 1 | 2 | 3 | 4 | 5 |
| 5、My anger comes fast and go fast                                                                           | 1 | 2 | 3 | 4 | 5 |
| 6、I have high levels of jealous                                                                             | 1 | 2 | 3 | 4 | 5 |
| 7、If someone bother me on purpose, I will beat him or her                                                   | 1 | 2 | 3 | 4 | 5 |
| 8、I like to deny others’ opinion                                                                            | 1 | 2 | 3 | 4 | 5 |
| 9、I feel upset when the things are not go well                                                              | 1 | 2 | 3 | 4 | 5 |
| 10、I feel I meet much more unfired things                                                                   | 1 | 2 | 3 | 4 | 5 |
| 11、When I angry I will hurt myself due to careless                                                          | 1 | 2 | 3 | 4 | 5 |
| 12、If someone beat me, I will beat back                                                                     | 1 | 2 | 3 | 4 | 5 |
| 13、When others disturb me, I will blame them without hesitation                                             | 1 | 2 | 3 | 4 | 5 |
| 14、I feel like a bomb when I angry, and will boom anytime                                                   | 1 | 2 | 3 | 4 | 5 |
| 15、I will suspect others’ purposes when strangers treat me too kindly                                       | 1 | 2 | 3 | 4 | 5 |
| 16、I fight more than others                                                                                 | 1 | 2 | 3 | 4 | 5 |
| 17、I will lost my control to debate when others disagree with me                                            | 1 | 2 | 3 | 4 | 5 |
| 18、I have difficulties to control my temper                                                                 | 1 | 2 | 3 | 4 | 5 |
| 19、I will take something to heart                                                                           | 1 | 2 | 3 | 4 | 5 |
| 20、I will use violent to protect my rights when necessary                                                   | 1 | 2 | 3 | 4 | 5 |
| 21、I easily quarrel with others                                                                             | 1 | 2 | 3 | 4 | 5 |
| 22、I easily breast anger when I see things less than satisfactory                                           | 1 | 2 | 3 | 4 | 5 |
| 23、I think someone speak ill of me                                                                          | 1 | 2 | 3 | 4 | 5 |
| 24、If someone bother me at a proper extent, I will fight with others                                        | 1 | 2 | 3 | 4 | 5 |
| 25、I will lost my temper without any reason                                                                 | 1 | 2 | 3 | 4 | 5 |
| 26、I think others may have purposes when they treat me too kindly                                           | 1 | 2 | 3 | 4 | 5 |

|                                                   |   |   |   |   |   |
|---------------------------------------------------|---|---|---|---|---|
| 27、I will throw out things when I feel very anger | 1 | 2 | 3 | 4 | 5 |
| 28、I suspect someone laugh at me                  | 1 | 2 | 3 | 4 | 5 |

| Supplementary file S3: Self-esteem Scale                                 |   |   |   |    |  |
|--------------------------------------------------------------------------|---|---|---|----|--|
| 1、I think I am a valuable person, at least with the same level to others | 1 | 2 | 3 | 4  |  |
| 2、I think I have many good qualities                                     | 1 | 2 | 3 | 4  |  |
| 3、I think I am a loser ultimately                                        | 1 | 2 | 3 | 4  |  |
| 4、I think I can finish things like most person                           | 1 | 2 | 3 | 4  |  |
| 5、I think I have few qualities which makes me proud.                     | 1 | 2 | 3 | 4  |  |
| 6、I have positive feeling to myself                                      | 1 | 2 | 3 | 4  |  |
| 7、I satisfy to myself                                                    | 1 | 2 | 3 | 4  |  |
| 8、I hope I can receive more respect                                      | 1 | 2 | 3 | 4  |  |
| 9、I feel worthless sometime                                              | 1 | 2 | 3 | 44 |  |
| 10、I always feel worthless                                               | 1 | 2 | 3 | 4  |  |

**Supplementary file S4: The Chinese Adolescents Resilience Scale**

| 题目 (Subjects)                                                                 | 选项 (Options) |   |   |   |   |
|-------------------------------------------------------------------------------|--------------|---|---|---|---|
| 1、I am discouraged by failures                                                | 1            | 2 | 3 | 4 | 5 |
| 2、I have difficulty to control my unpleasant emotions                         | 1            | 2 | 3 | 4 | 5 |
| 3、I have specific goals for my life                                           | 1            | 2 | 3 | 4 | 5 |
| 4、I will become more mature and experiences when I suffered some frustrations | 1            | 2 | 3 | 4 | 5 |
| 5、Failures and frustrations will make me suspect my ability                   | 1            | 2 | 3 | 4 | 5 |
| 6、I cannot find a person all the time when I have met unpleasant things       | 1            | 2 | 3 | 4 | 5 |
| 7、I have a peer friend who I can share my difficulties                        | 1            | 2 | 3 | 4 | 5 |
| 8、My parents respect my opinion                                               | 1            | 2 | 3 | 4 | 5 |
| 9、I do not know who can help me when I have difficulties                      | 1            | 2 | 3 | 4 | 5 |
| 10、I think compare to results, the process may help people grow fast          | 1            | 2 | 3 | 4 | 5 |
| 11、I will make a plan and a solution when I meet difficulties                 | 1            | 2 | 3 | 4 | 5 |
| 12、I always put things in my heart other than tell to others                  | 1            | 2 | 3 | 4 | 5 |
| 13、I think adversity can inspire people                                       | 1            | 2 | 3 | 4 | 5 |
| 14、Adversity may be helpful for person's grow up                              | 1            | 2 | 3 | 4 | 5 |
| 15、My parents always interrupt my opinion                                     | 1            | 2 | 3 | 4 | 5 |
| 16、Nobody could listen to me in my family                                     | 1            | 2 | 3 | 4 | 5 |
| 17、My parents could not support me at confidences and spirits                 | 1            | 2 | 3 | 4 | 5 |
| 18、I will tell to others when I have problems                                 | 1            | 2 | 3 | 4 | 5 |
| 19、My parents never berate me                                                 | 1            | 2 | 3 | 4 | 5 |
| 20、I will concentrate all my strength when I face difficulties                | 1            | 2 | 3 | 4 | 5 |
| 21、I need more time to forget the unpleasant things                           | 1            | 2 | 3 | 4 | 5 |
| 22、My parents always encourage me to do my best                               | 1            | 2 | 3 | 4 | 5 |
| 23、I can regulate my emotions in a short time                                 | 1            | 2 | 3 | 4 | 5 |
| 24、I will set goals to push me                                                | 1            | 2 | 3 | 4 | 5 |
| 25、I think everything has a positive aspect                                   | 1            | 2 | 3 | 4 | 5 |
